# Supplementary material for: Bladder Neck Obstruction: Experience and Management in a Sperm Bank
Source: MDPI journal article supplement (doi:10.3390/life13030842), 2023-03-20
Supplement: s1 [file s1]

**Supplementary Table S1.** Data from the literature on retrograde ejaculation rate after bladder neck incision.

| Reference               | Year | Enrolled pts | Incision      | Retrograde ejaculation (%) |
|-------------------------|------|--------------|---------------|----------------------------|
| Andersen et al. [12]    | 1980 | 28           | Bilateral     | 0                          |
| Webster et al. [6]      | 1980 | 16           | Unilateral    | 0                          |
| Moisey et al. [15]      | 1982 | 38           | Unilateral    | 16                         |
| Delaere et al. [13]     | 1983 | 32           | Bilateral     | 36                         |
| Hedlund et al. [11]     | 1985 | 61           | Uni/Bilateral | 5/5                        |
| Christensen et al. [14] | 1985 | 131          | Bilateral     | 22                         |
| Norlen et al. [9]       | 1986 | 23           | Uni/bilateral | 0/100                      |
| Mobb et al. [16]        | 1988 | 64           | Unilateral    | 16                         |
| Kaplan et al. [5]       | 1994 | 31           | Unilateral    | 0                          |
| El-Baz et al. [10]      | 1995 | 62           | Bilateral     | 8                          |
| Trockman et al. [7]     | 1996 | 36           | Bilateral     | 27                         |
| Neykov et al. [8]       | 1998 | 35           | Bilateral     | 8.5                        |
| Kochakarn et al. [4]    | 2003 | 35           | Unilateral    | 0                          |
| Yang et al. [24]        | 2008 | 32           | Unilateral    | 0                          |
